# Supplementary material
Source: PubMed Central journal article supplement (PMC7990518)

**Note to readers with disabilities:** *EHP* strives to ensure that all journal content is accessible to all readers. However, some figures and Supplemental Material published in *EHP* articles may not conform to [508 standards](#) due to the complexity of the information being presented. If you need assistance accessing journal content, please contact [ehp508@niehs.nih.gov](mailto:ehp508@niehs.nih.gov). Our staff will work with you to assess and meet your accessibility needs within 3 working days.

### **Supplemental Material**

#### **Cross-Sectional Estimation of Endogenous Biomarker Associations with Prenatal Phenols, Phthalates, Metals, and Polycyclic Aromatic Hydrocarbons in Single-Pollutant and Mixtures Analysis Approaches**

Max T. Aung, Youfei Yu, Kelly K. Ferguson, David E. Cantonwine, Lixia Zeng, Thomas F. McElrath, Subramaniam Pennathur, Bhramar Mukherjee, and John D. Meeker

#### **Table of Contents**

**Figure S1.** Directed acyclic graph of the relationship between environmental toxicants and endogenous biomarkers.

**Table S1.** LIFECODES cohort characteristics in subset and larger study sample.

**Figure S2.** Heat map of pairwise associations between exposure analytes and endogenous biomarkers estimated using multiple linear regression using case control covariate adjustment. The sample size for most models is N=160, except for the following biomarkers: BCPGE1 (N=159), LTE4 (N=132), sFlt-1 (N=156), and PGF (N=157). Black and blue grids indicate positive and negative associations, respectively. Color intensities are representative of p-values, i.e. darker grids indicate smaller p-values. Pairwise associations that remain significant after controlling the false discovery rate at 0.2 are labeled by white 'X' symbols. Abbreviations and subclasses of toxicants are defined in **Figure 1**.

**Additional File-** Excel Document

**Figure S1.** Directed acyclic graph of the relationship between environmental toxicants and endogenous biomarkers.

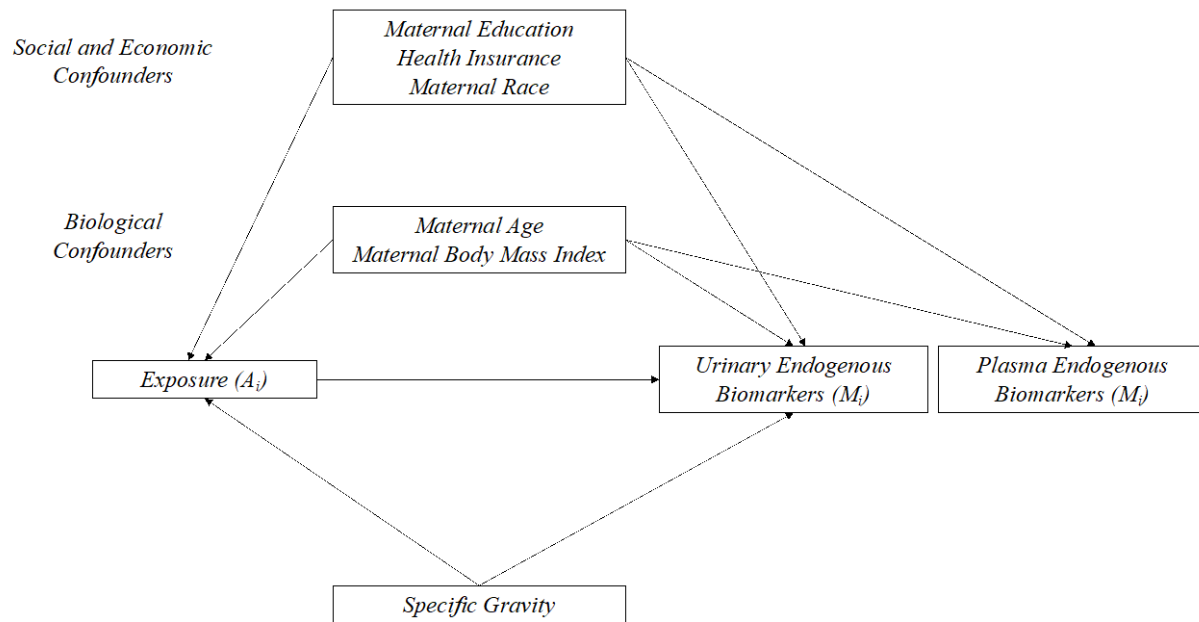

**Table S1.** LIFECODES cohort characteristics in subset and larger study sample.

| <b>Population Characteristics</b> |                                            | <b>Subset (N=173)</b>  | <b>Overall LIFECODES (N=482)</b> |
|-----------------------------------|--------------------------------------------|------------------------|----------------------------------|
|                                   |                                            | <b>Count (percent)</b> | <b>Count (percent)</b>           |
| Preterm Birth                     | Case                                       | 58 (33.5%)             | 130 (27%)                        |
|                                   | Control                                    | 115 (66.5)             | 352 (73%)                        |
| Age                               | 18 - 24                                    | 8 (4.62%)              | 54 (11.2%)                       |
|                                   | 25 - 29                                    | 32 (18.5%)             | 95 (19.7%)                       |
|                                   | 30 - 34                                    | 90 (52.0%)             | 190 (39.4%)                      |
|                                   | 35 +                                       | 43 (24.9%)             | 143 (29.7%)                      |
|                                   | White                                      | 108 (62.4%)            | 282 (58.5%)                      |
| Race/ethnicity                    | African-American                           | 21 (12.1%)             | 77 (16.0%)                       |
|                                   | Other                                      | 44 (25.4%)             | 123 (25.5%)                      |
|                                   | High school degree (13 years)              | 24 (13.9%)             | 68 (14.1%)                       |
| Education                         | Technical school (>13 years)               | 20 (11.6%)             | 77 (16.0%)                       |
|                                   | Junior college or some college (>13 years) | 57 (32.9%)             | 139 (28.8%)                      |
|                                   | College graduate (16+ years)               | 72 (41.6%)             | 187 (38.8%)                      |
|                                   | Missing                                    | -                      | 11 (2.3%)                        |
|                                   | Private/HMO/Self-pay                       | 153 (88.4%)            | 385 (79.9%)                      |
| Health Insurance Provider         | Medicaid/SSI/MassHealth                    | 19 (11.0%)             | 85 (17.6%)                       |
|                                   | Missing                                    | 1 (0.58%)              | 12 (2.5%)                        |
|                                   | <25 kg/m <sup>2</sup>                      | 84 (48.6%)             | 250 (51.9%)                      |
| BMI at Initial Visit              | 25 - 29.9 kg/m <sup>2</sup>                | 49 (28.3%)             | 126 (26.1%)                      |
|                                   | ≥ 30 kg/m <sup>2</sup>                     | 40 (23.1%)             | 102 (21.2%)                      |
|                                   | Missing                                    | -                      | 4 (0.8%)                         |
| Tobacco Use                       | No smoking during pregnancy                | 161 (93.1%)            | 445 (92.3%)                      |
|                                   | Smoked during pregnancy                    | 12 (6.9%)              | 31 (6.4%)                        |
|                                   | Missing                                    | -                      | 6 (1.2%)                         |
| Alcohol Use                       | No alcohol use during pregnancy            | 163 (94.2%)            | 452 (93.8%)                      |
|                                   | Alcohol use during pregnancy               | 7 (4.0%)               | 20 (4.1%)                        |
|                                   | Missing                                    | 3 (1.7%)               | 10 (2.1%)                        |
| Fetal Sex                         | Female                                     | 79 (45.7%)             | 213 (44.4%)                      |
|                                   | Male                                       | 94 (54.3%)             | 267 (55.6%)                      |

**Figure S2.** Heat map of pairwise associations between exposure analytes and endogenous biomarkers estimated using multiple linear regression using case control covariate adjustment. The sample size for most models is N=160, except for the following biomarkers: BCPGE1 (N=159), LTE4 (N=132), sFlt-1 (N=156), and PGF (N=157). Black and blue grids indicate positive and negative associations, respectively. Color intensities are representative of p-values, i.e. darker grids indicate smaller p-values. Pairwise associations that remain significant after controlling the false discovery rate at 0.2 are labeled by white 'X' symbols. Abbreviations and subclasses of toxicants are defined in **Figure 1**.

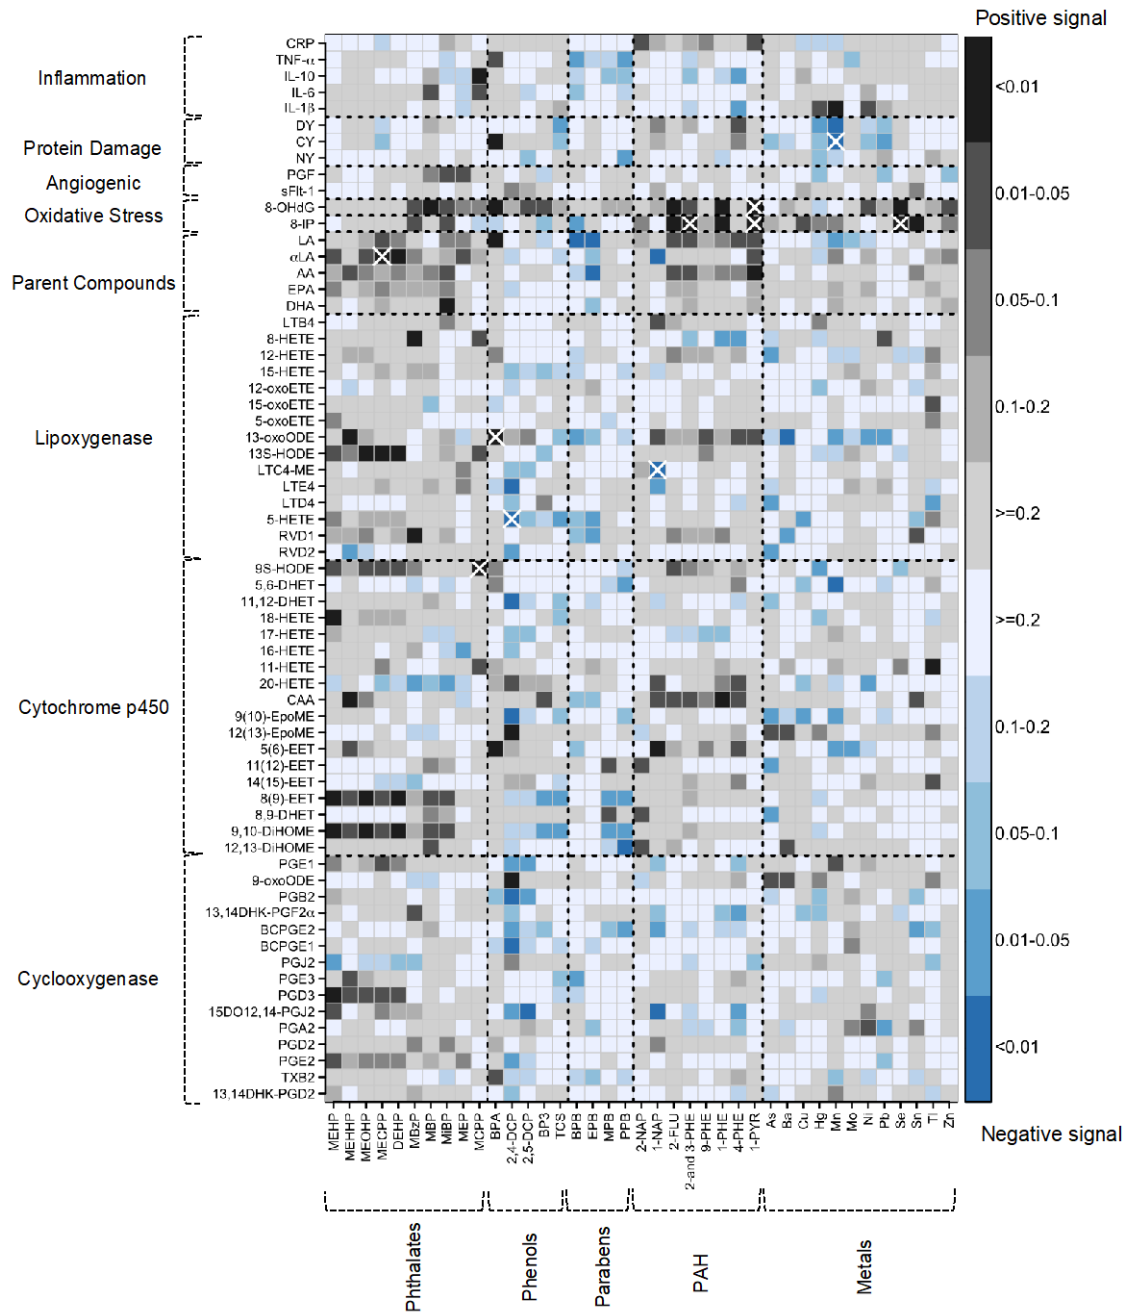

Supplement: ehp7396.s001.acco.pdf [file ehp7396.s001.acco.pdf]
